# Supplementary material for: Comprehensive assessment of the coupling coordination degree between urbanization and ecological environment in the Siberian and Far East Federal Districts, Russia from 2005 to 2017
Source: PeerJ. 2020 Jun 15;8:e9125. doi: 10.7717/peerj.9125 (PMC7301896; doi:10.7717/peerj.9125)
Supplement: Supplemental Information 1 [file peerj-08-9125-s001.xlsx]

## Sheet: urbanization
Percentage of urban population (%)
	2005	2006	2007	2008	2009	2010	2011	2012	2013	2014	2015	2016	2017		2000	2001	2002	2003	2004	2005	2006	2007	2008	2009	2010	2011	2012	2013	2014	2015	2016	2017			2000	2001	2002	2003	2004	2005	2006	2007	2008	2009	2010	2011	2012	2013	2014
Republic of Altay	26	26.1	26.2	26.4	26.6	27.7	28.7	28.9	29	29.2	29.2	29.2	29	Республика Алтай	203	203	203	203	204	204	205	207	209	211	207	209	210	211	214	215	217	218		Республика Алтай	#REF!	#REF!	#REF!	#REF!	#REF!	784.615	785.441	790.076	791.667	793.233	747.292	728.223	726.644	727.586	732.877
Republic of Buryatia	55.7	55.2	55.1	54.8	56.5	58.5	58.8	59	58.8	58.9	59	58.9	59	Республика Бурятия	997	987	980	974	969	964	960	960	961	963	972	971	972	974	978	982	984	985		Республика Бурятия	#REF!	#REF!	#REF!	#REF!	#REF!	1730.7	1739.13	1742.29	1753.65	1704.42	1661.54	1651.36	1647.46	1656.46	1660.44
Republic of Tuva	51.5	51.4	51.2	51.2	51.5	53.1	53.6	53.9	54	53.9	54.2	54	54	Республика Тыва	306	305	305	306	308	309	309	312	314	317	308	309	310	312	314	316	318	322		Республика Тыва	#REF!	#REF!	#REF!	#REF!	#REF!	600	601.167	609.375	613.281	615.534	580.038	576.493	575.139	577.778	582.56
Republic of Khakassia	71.1	71.1	71.1	71.1	68.2	67.4	67.5	67.7	68.1	68.5	68.8	69.1	69.4	Республика Хакасия	554	549	545	543	541	538	537	537	538	539	532	532	533	534	536	537	537	538		Республика Хакасия	#REF!	#REF!	#REF!	#REF!	#REF!	756.681	755.274	755.274	756.681	790.323	789.318	788.148	787.297	784.141	782.482
Altai Kray	53.5	53.6	53.6	53.7	53.4	54.8	55.2	55.5	55.8	56	56.2	56.3	56.4	Алтайский край	2641	2621	2603	2583	2565	2543	2523	2508	2497	2491	2417	2407	2399	2391	2385	2377	2366	2350		Алтайский край	#REF!	#REF!	#REF!	#REF!	#REF!	4753.27	4707.09	4679.1	4649.91	4664.79	4410.58	4360.51	4322.52	4284.95	4258.93
Zabaykalskiy Kray	63.4	63.4	63.6	63.7	63.9	66	66.4	66.8	67.1	67.4	67.7	68	68.2	Забайкальский край	1179	1165	1153	1144	1136	1128	1122	1119	1117	1117	1106	1100	1095	1090	1087	1083	1079	1073		Забайкальский край	#REF!	#REF!	#REF!	#REF!	#REF!	1779.18	1769.72	1759.43	1753.53	1748.04	1675.76	1656.63	1639.22	1624.44	1612.76
Krasnoyarsk Kray	75.6	75.4	75.9	75.7	75.9	76.4	76.5	76.6	76.4	76.7	77	77.2	77.4	Красноярский край	3001	2982	2962	2942	2925	2906	2894	2890	2890	2894	2829	2838	2847	2853	2859	2866	2875	2876		Красноярский край	#REF!	#REF!	#REF!	#REF!	#REF!	3843.92	3838.2	3807.64	3817.7	3812.91	3702.88	3709.8	3716.71	3734.29	3727.51
Irkutsk Oblast	79.1	79	78.9	78.9	78.8	79.6	79.6	79.5	79.4	78.9	79	78.9	78.8	Иркутская область	2623	2600	2578	2561	2545	2527	2514	2508	2505	2503	2428	2424	2422	2418	2415	2413	2409	2404		Иркутская область	#REF!	#REF!	#REF!	#REF!	#REF!	3194.69	3182.28	3178.71	3174.9	3176.4	3050.25	3045.23	3046.54	3045.34	3060.84
Kemerovsk Oblast	85	85	84.9	84.9	84.9	85.4	85.4	85.5	85.6	85.7	85.8	85.8	86	Кемеровская область	2943	2918	2893	2872	2855	2839	2826	2823	2822	2821	2761	2751	2742	2734	2725	2718	2709	2695		Кемеровская область	#REF!	#REF!	#REF!	#REF!	#REF!	3340	3324.71	3325.09	3323.91	3322.73	3233.02	3221.31	3207.02	3193.93	3179.7
Novosibirsk Oblast	75.1	75.2	75.3	75.5	75.7	77.3	77.6	77.9	78.2	78.5	78.7	78.9	79	Новосибирская область	2715	2703	2688	2673	2662	2650	2641	2636	2640	2650	2666	2687	2710	2731	2747	2762	2780	2789		Новосибирская область	#REF!	#REF!	#REF!	#REF!	#REF!	3528.63	3511.97	3500.66	3496.69	3500.66	3448.9	3462.63	3478.82	3492.33	3499.36
Omsk Oblast	69.1	69.2	69.3	69.3	69.3	71.5	71.6	71.8	71.9	72.2	72.4	72.6	72.7	Омская область	2117	2095	2075	2059	2047	2035	2026	2018	2014	2012	1977	1975	1974	1974	1978	1978	1973	1960		Омская область	#REF!	#REF!	#REF!	#REF!	#REF!	2945.01	2927.75	2911.98	2906.2	2903.32	2765.03	2758.38	2749.3	2745.48	2739.61
Tomsk Oblast	68.4	68.6	68.8	69	69.3	70.3	70.9	71.2	71.6	71.9	72.2	72.3	72.4	Томская область	1054	1050	1046	1041	1037	1034	1033	1035	1038	1043	1049	1058	1064	1070	1074	1077	1079	1078		Томская область	#REF!	#REF!	#REF!	#REF!	#REF!	1511.7	1505.83	1504.36	1504.35	1505.05	1492.18	1492.24	1494.38	1494.41	1493.74
Srepublic of Sakha	64.2	64.5	65.1	65.5	65.5	64.1	64.6	64.9	65.2	65.3	65.4	65.5	65.6	Республика Саха (Якутия)	958	952	949	949	951	950	950	951	950	949	958	956	956	955	957	960	963	964		Республика Саха (Якутия)	#REF!	#REF!	#REF!	#REF!	#REF!	1479.75	1472.87	1460.83	1450.38	1448.85	1494.54	1479.88	1473.04	1464.72	1465.54
Primorskiy Kray	79.4	79.6	79.8	78.8	79.1	77.4	77.5	77.1	77.4	77.5	77.8	78	78.2	Камчатский край	367	362	358	355	352	349	347	346	344	342	322	320	320	320	317	316	315	316		Камчатский край	#REF!	#REF!	#REF!	#REF!	#REF!	439.547	435.93	433.584	436.548	432.364	416.021	412.903	415.045	413.437	409.032
Khabarovskiy Kray	75.4	75.4	75.3	75.4	75.4	76.1	76.3	76.6	76.7	76.9	77	77.1	77.2	Приморский край	2120	2086	2067	2051	2036	2019	2006	1996	1988	1982	1953	1951	1947	1938	1933	1929	1923	1913		Приморский край	#REF!	#REF!	#REF!	#REF!	#REF!	2677.72	2660.48	2650.73	2636.6	2628.65	2566.36	2557.01	2541.78	2526.73	2513.65
Amursk Oblast	80.5	80.6	80.6	80.5	80.5	81.8	81.5	81.5	81.7	81.8	82	82.1	82.1	Хабаровский край	1460	1446	1434	1427	1420	1412	1405	1404	1402	1400	1343	1342	1342	1340	1338	1334	1333	1328		Хабаровский край	#REF!	#REF!	#REF!	#REF!	#REF!	1754.04	1743.18	1741.94	1741.61	1739.13	1641.81	1646.63	1646.63	1640.15	1635.7
Kamchatskiy Kray	65.7	65.6	65.5	65.4	65.2	66.9	67	67.1	67.1	67.3	67.3	67.3	67.4	Амурская область	923	911	901	894	887	881	875	870	864	861	829	821	817	811	810	806	802	798		Амурская область	#REF!	#REF!	#REF!	#REF!	#REF!	1340.94	1333.84	1328.24	1321.1	1320.55	1239.16	1225.37	1217.59	1208.64	1203.57
Magadansk Oblast	94.4	94.8	95	95.3	95.6	95.5	95.7	95.8	95.3	95.4	95.5	95.7	95.9	Магаданская область	194	187	182	178	175	172	169	166	163	161	156	155	152	150	148	147	146	144		Магаданская область	#REF!	#REF!	#REF!	#REF!	#REF!	182.203	178.27	174.737	171.039	168.41	163.351	161.964	158.664	157.398	155.136
Sakhalin Oblast	77.7	77.9	78.1	78.2	78.3	79.8	80.3	80.8	81.2	81.4	81.6	81.8	82	Сахалинская область	560	552	545	538	532	526	521	518	514	511	497	495	494	491	488	487	487	490		Сахалинская область	#REF!	#REF!	#REF!	#REF!	#REF!	676.963	668.806	663.252	657.289	652.618	622.807	616.438	611.386	604.68	599.509
Jewish Autonomous Oblast	66.3	66.1	66.2	66.2	66.1	67.8	68.1	67.9	67.9	68.2	68.6	68.6	68.8	Еврейская автономная область	193	192	191	190	189	187	186	186	185	185	176	175	173	171	169	166	164	162		Еврейская автономная область	#REF!	#REF!	#REF!	#REF!	#REF!	282.051	281.392	280.967	279.456	279.879	259.587	256.975	254.786	251.841	247.801
Chukotska Autonomous Oblast	66.3	66.5	66.6	66.4	66.4	64.9	66	66.7	67.5	68.3	69.2	70	70.5	Чукотский автономный округ	57	55	53	52	51	51	50	50	50	49	51	51	51	51	51	50	50	50		Чукотский автономный округ	#REF!	#REF!	#REF!	#REF!	#REF!	76.9231	75.188	75.0751	75.3012	73.7952	78.5824	77.2727	76.4618	75.5556	74.6706
Percentage of economic activity population (%)
	2005	2006	2007	2008	2009	2010	2011	2012	2013	2014	2015	2016	2017
Republic of Altay	63.1	63.6	65.4	64.6	66.7	67.6	67.6	67.3	67.7	66.8	67.7	66.8	66.3
Republic of Buryatia	61.2	60.9	62	65.8	62.2	64.9	63.7	63.9	63.8	63.8	64.5	63.9	62.4
Republic of Tuva	62.1	58.7	59.4	56.8	58	59.1	63	56.5	57.7	59.8	60.4	62.3	61.5
Republic of Khakassia	66.3	62.7	64.5	64	66.8	64.8	66.1	64.7	65.8	64.4	65.9	65.7	65.4
Altai Kray	64.5	65.6	65.4	66.1	65.3	66.5	65.4	65	62.6	63.6	65.8	65.1	63.8
Zabaykalskiy Kray	62.7	60.6	62.3	64.2	64.2	62.8	63.9	64.4	64.8	65.6	66.3	66.8	67.2
Krasnoyarsk Kray	67.9	67.5	67.7	67.1	69	69.8	68.3	68.6	68.8	69.6	68.9	68.4	69.1
Irkutsk Oblast	66.3	65.3	68.1	68	67.5	67.1	68	67.7	68.5	68.1	69.9	69.9	68.1
Kemerovsk Oblast	66.2	66	65.9	66.5	65.9	65.8	66.5	66.7	67.7	67.9	67	67.4	65.9
Novosibirsk Oblast	65.1	65	65.7	68.3	67.4	68.1	69.3	69	68.7	68.6	69.1	69.8	68.5
Omsk Oblast	64.8	63.8	65.4	67.6	66.8	67.7	69.3	68.8	69.3	69.7	70.2	70.4	69.5
Tomsk Oblast	63.2	64	67.7	66.3	66.3	65.8	62.4	60	62.6	67	64	66.8	64.9
Srepublic of Sakha	68.1	69.4	68.7	69.7	69.4	68.1	68.1	69.8	70.4	70.6	70.8	69.4	70.6
Primorskiy Kray	72	71	72.6	71.9	72.6	72.6	73.7	72.9	73.9	73.7	74.3	73.2	72.1
Khabarovskiy Kray	65.7	64.5	67.7	68.9	68.2	67.7	67.8	68.3	68.8	69	69.7	70.1	69.7
Amursk Oblast	66.5	67.8	66.3	69.7	68	68.5	69.8	69.9	70	70.5	69.6	71	71.6
Kamchatskiy Kray	60.6	63.2	63.7	63.6	66.6	65.4	69.6	67.3	65.9	67.3	66.8	67.6	68.2
Magadansk Oblast	70.5	71	73.4	75.2	76.8	78.1	79.5	79.1	79	76.8	77.7	76.9	78.5
Sakhalin Oblast	71.4	71	69.4	71.3	70.6	71.5	72.7	72.4	72.1	72.3	72.7	73.3	73.3
Jewish Autonomous Oblast	61.4	59.2	59.4	62.3	61.3	62.9	65.1	65.4	65.6	65	65.6	66.8	66.4
Chukotska Autonomous Oblast	79	82.9	82.1	79.3	80.9	81.4	83	82.5	83.1	83.9	81.8	82.5	80.6
Population density (people/km2)
	2005	2006	2007	2008	2009	2010	2011	2012	2013	2014	2015	2016	2017
Republic of Altay	2.19591	2.20667	2.2282	2.24973	2.27126	2.2282	2.24973	2.2605	2.27126	2.30355	2.31432	2.33584	2.34661
Republic of Buryatia	2.74409	2.73271	2.73271	2.73555	2.74125	2.76687	2.76402	2.76687	2.77256	2.78395	2.79533	2.80102	2.80387
Republic of Tuva	1.83274	1.83274	1.85053	1.8624	1.88019	1.82681	1.83274	1.83867	1.85053	1.8624	1.87426	1.88612	1.90985
Republic of Khakassia	8.73377	8.71753	8.71753	8.73377	8.75	8.63636	8.63636	8.6526	8.66883	8.7013	8.71753	8.71753	8.73377
Altai Kray	15.1369	15.0179	14.9286	14.8631	14.8274	14.3869	14.3274	14.2798	14.2321	14.1964	14.1488	14.0833	13.9881
Zabaykalskiy Kray	2.61172	2.59782	2.59088	2.58625	2.58625	2.56078	2.54689	2.53531	2.52373	2.51679	2.50752	2.49826	2.48437
Krasnoyarsk Kray	1.22782	1.22275	1.22106	1.22106	1.22275	1.19528	1.19909	1.20289	1.20543	1.20796	1.21092	1.21472	1.21514
Irkutsk Oblast	3.26149	3.24471	3.23696	3.23309	3.23051	3.13371	3.12855	3.12597	3.12081	3.11693	3.11435	3.10919	3.10274
Kemerovsk Oblast	29.6656	29.5298	29.4984	29.488	29.4775	28.8506	28.7461	28.652	28.5684	28.4744	28.4013	28.3072	28.1609
Novosibirsk Oblast	14.9044	14.8538	14.8256	14.8481	14.9044	14.9944	15.1125	15.2418	15.36	15.4499	15.5343	15.6355	15.6862
Omsk Oblast	14.4224	14.3586	14.3019	14.2736	14.2594	14.0113	13.9972	13.9901	13.9901	14.0184	14.0184	13.983	13.8909
Tomsk Oblast	3.2888	3.28562	3.29198	3.30153	3.31743	3.33651	3.36514	3.38422	3.40331	3.41603	3.42557	3.43193	3.42875
Srepublic of Sakha	0.308091	0.308091	0.308416	0.308091	0.307767	0.310686	0.310037	0.310037	0.309713	0.310362	0.311335	0.312307	0.312632
Primorskiy Kray	0.751669	0.747362	0.745208	0.7409	0.736593	0.693517	0.68921	0.68921	0.68921	0.682748	0.680594	0.678441	0.680594
Khabarovskiy Kray	12.2587	12.1797	12.119	12.0704	12.034	11.8579	11.8458	11.8215	11.7668	11.7365	11.7122	11.6758	11.6151
Amursk Oblast	1.79279	1.7839	1.78263	1.78009	1.77755	1.70518	1.70391	1.70391	1.70137	1.69883	1.69375	1.69248	1.68614
Kamchatskiy Kray	2.43437	2.41779	2.40398	2.3874	2.37911	2.29069	2.26858	2.25753	2.24095	2.23819	2.22713	2.21608	2.20503
Magadansk Oblast	0.371892	0.365405	0.358919	0.352432	0.348108	0.337297	0.335135	0.328649	0.324324	0.32	0.317838	0.315676	0.311351
Sakhalin Oblast	6.03904	5.98163	5.94719	5.90126	5.86682	5.70608	5.68312	5.67164	5.6372	5.60276	5.59127	5.59127	5.62572
Jewish Autonomous Oblast	5.15152	5.12397	5.12397	5.09642	5.09642	4.84848	4.82094	4.76584	4.71074	4.65565	4.573	4.51791	4.46281
Chukotska Autonomous Oblast	0.0706861	0.0693001	0.0693001	0.0693001	0.0679141	0.0706861	0.0706861	0.0706861	0.0706861	0.0706861	0.0693001	0.0693001	0.0693001
Gross regional product per capita (rubles)
	2005	2006	2007	2008	2009	2010	2011	2012	2013	2014	2015	2016	2017
Republic of Altay	43592.3	57555.4	74633.6	91713.1	97112.1	108730	127150	145400	157887	184282	196639	213474	206271
Republic of Buryatia	77313.2	94965.1	111354	129145	125172	137565	158137	169553	181828	191044	206880	202628	205002
Republic of Tuva	38429.7	50051.7	63959.4	78381	87889.5	99999.9	108178	120583	132746	146907	150266	164687	186364
Republic of Khakassia	77864.6	100828	119953	136024	152205	180352	212488	245294	265861	296058	317764	339586	386391
Altai Kray	53812.4	69852	90759.9	106020	109089	124956	137677	153557	173764	186799	204933	210351	214554
Zabaykalskiy Kray	61741	81066.2	99544.9	126362	133974	150549	184869	204112	209781	215668	228215	243110	278124
Krasnoyarsk Kray	152389	205042	258394	260318	264479	372848	413172	416273	441085	493986	582346	615804	655655
Irkutsk Oblast	102904	133414	163588	178988	187689	224364	261550	304546	332700	379172	414986	443298	494465
Kemerovsk Oblast	104764	122394	157302	207286	184674	226198	272564	261527	243932	275514	309904	316264	389982
Novosibirsk Oblast	88475.5	111679	138199	171430	160210	181733	223623	269870	300522	332683	370896	391438	411731
Omsk Oblast	108971	130614	148129	174710	169328	193216	228487	248940	279510	304958	312450	316828	329547
Tomsk Oblast	155365	184434	209320	241911	237293	272576	317037	350117	377218	401260	438316	451824	474126
Srepublic of Sakha	191896	216536	253424	322922	342520	403658	508674	566387	597037	688540	780140	903611	953516
Primorskiy Kray	129241	168173	200610	238404	291954	319849	356413	397726	416493	457553	553864	628114	639282
Khabarovskiy Kray	92504.2	108099	130632	160417	187556	240221	281618	286057	297224	331845	371596	382587	403846
Amursk Oblast	116258	141995	170398	198952	205081	262686	297609	326306	371416	402760	445810	478031	499270
Kamchatskiy Kray	88597.1	111116	131888	156330	180572	214827	273176	280024	258817	286283	343386	357829	331030
Magadansk Oblast	157799	185018	213450	258848	299404	377895	464113	511125	587477	649745	854562	1.00659e+06	1.07994e+06
Sakhalin Oblast	230298	321109	559774	657783	779943	977256	1.21e+06	1298440	1.36487e+06	1631919	1.71673e+06	1.57564e+06	1.58259e+06
Jewish Autonomous Oblast	77319.2	99578.4	132505	134378	142388	178381	225066	246301	224043	247667	266406	283783	318709
Chukotska Autonomous Oblast	237134	295107	396907	582270	872422	767846	883369	896822	877613	1.1425e+06	1226152	1.3232e+06	1.37486e+06
Average income per capita (rubles/month)
	2005	2006	2007	2008	2009	2010	2011	2012	2013	2014	2015	2016	2017
Republic of Altay	4334	5470	6934	10172	10813	13536	13837	14283	14752	17134	18254	17833	18411
Republic of Buryatia	6044	7020	8892	11298	13011	14271	15715	17688	20785	22326	25480	25172	25040
Republic of Tuva	4099	4720	5817	7871	9738	10160	10963	12014	13472	14083	15246	14111	14048
Republic of Khakassia	5141	6367	7982	10764	11531	12806	14223	16012	17876	18385	20789	21034	21209
Altai Kray	4580	6256	7438	9749	9611	11029	12500	13617	15979	18434	20985	21497	22165
Zabaykalskiy Kray	5887	7081	8212	10971	12591	14205	15969	17546	19886	20520	22980	22885	23267
Krasnoyarsk Kray	7710	9640	12654	15605	16570	18262	20145	22524	24922	24806	27102	28035	28047
Irkutsk Oblast	7041	8684	10078	12882	13511	15110	16017	17820	19425	20224	22445	22268	22412
Kemerovsk Oblast	7813	9443	11700	14439	13470	15341	16666	18511	19697	20193	21827	21263	21849
Novosibirsk Oblast	6650	8399	10317	13080	15059	16276	18244	20728	22597	23110	24176	25407	25313
Omsk Oblast	6916	8993	11318	13626	13814	15199	17248	19495	21364	24060	25839	25241	25223
Tomsk Oblast	8076	9896	11890	13482	13776	15070	16516	18027	20430	21549	24846	24326	24457
Srepublic of Sakha	11391	13630	15683	18741	21279	23088	25617	28701	31528	34205	37805	38937	39765
Primorskiy Kray	10834	13237	15962	19063	22581	27010	28965	31764	35371	37030	41029	41058	42342
Khabarovskiy Kray	7127	9041	10797	12808	15140	17298	19160	21679	24343	28340	32983	32446	33155
Amursk Oblast	9451	11999	14574	15705	19071	22479	23766	25689	29382	31703	36621	37467	37698
Kamchatskiy Kray	5874	7233	9389	11936	12752	14323	17790	21800	24671	26765	30197	29661	30663
Magadansk Oblast	11107	13748	16460	19703	24165	27801	30452	36620	42463	45846	50173	50755	53633
Sakhalin Oblast	12548	16211	20178	24552	27577	30727	32268	32721	39971	44690	49585	49601	48727
Jewish Autonomous Oblast	6269	7396	8443	10877	13062	15348	16525	18450	20417	21935	24427	23720	23386
Chukotska Autonomous Oblast	20253	24320	27858	32140	35079	38147	43049	48533	52695	57310	61640	65679	70904
Per capita monetary expenses and savings (rubles)
	2005	2006	2007	2008	2009	2010	2011	2012	2013	2014	2015	2016	2017
Republic of Altay	2107	2714	3740	5282	5567	6172	7179	7897	8764	10034	10564	11083	11813
Republic of Buryatia	3927	4795	6134	7687	8550	9604	11340	13340	15058	15940	18258	18835	19288
Republic of Tuva	1958	2383	2847	3366	3722	4299	4945	5552	6090	6649	7441	7430	7657
Republic of Khakassia	2934	3806	4946	6197	6997	7926	9681	11560	12408	13398	14776	15007	15992
Altai Kray	3548	4579	5807	7556	7235	8165	9766	11236	12546	13687	14496	14957	15697
Zabaykalskiy Kray	3747	4563	5535	7250	8168	9192	10573	11944	13128	14095	15159	15870	16471
Krasnoyarsk Kray	5153	6582	8461	10671	10927	12246	14106	16735	18202	19134	18669	19732	20553
Irkutsk Oblast	4596	5644	6780	8515	8714	9286	10580	11832	12674	13535	13594	14461	15523
Kemerovsk Oblast	5224	6671	8389	10332	9152	9976	11237	12751	13892	13837	14259	14334	15234
Novosibirsk Oblast	5880	7376	9075	11221	11275	12648	14898	16493	18051	19187	18548	19053	20159
Omsk Oblast	4582	5678	7177	9060	9386	10402	12663	14513	16223	17409	17255	16945	18457
Tomsk Oblast	5547	6695	7751	9009	9155	9509	11199	11884	13285	13929	14987	15632	16479
Srepublic of Sakha	6780	8283	9682	11406	13056	14439	15977	17528	19269	21878	24146	26082	27458
Primorskiy Kray	5326	6991	8666	10527	12583	14050	16020	17837	19484	20836	22149	23481	24915
Khabarovskiy Kray	5075	6268	7477	9282	10475	11636	13215	15465	17585	19677	21769	22419	24203
Amursk Oblast	6157	7610	9223	11081	12882	14623	16805	18653	21216	23793	26212	28203	29788
Kamchatskiy Kray	3876	4806	5744	7372	8263	9599	12174	14696	16624	18481	20336	21254	22379
Magadansk Oblast	5568	6899	8384	10288	12553	13872	16321	19067	22345	24179	25362	27674	29642
Sakhalin Oblast	7521	10193	12474	16557	19503	21824	24146	25427	27846	30242	32824	33809	35409
Jewish Autonomous Oblast	4192	4895	5691	7070	8411	9446	10180	11625	12989	13999	15642	15942	16574
Chukotska Autonomous Oblast	5888	6490	7158	8785	12478	14501	14986	16108	16278	16392	18659	21990	25426
Unemployment rate (%)
	2005	2006	2007	2008	2009	2010	2011	2012	2013	2014	2015	2016	2017
Republic of Altay	10	11.6	9	12.6	13.9	12.2	12.8	11.6	11.5	10.4	9.7	12	12
Republic of Buryatia	12	13.5	12.9	11.6	14.1	10.4	9	7.9	8	8.4	9.2	9.6	9.6
Republic of Tuva	21.8	20.5	17.1	19.2	21.5	21.7	17.3	18.4	19.3	19.1	18.6	16.6	18.3
Republic of Khakassia	8.9	9.1	6.9	7.3	9	9.1	7.2	7.9	6	6.2	5.8	6.3	4.9
Altai Kray	9	8.8	6.5	8.4	12.3	8.8	8.5	6.2	8.3	7.2	8	8.6	6.9
Zabaykalskiy Kray	11.1	8.8	10.1	14.9	12.2	11.1	10.6	10.6	10.5	10	10.4	10.8	10.7
Krasnoyarsk Kray	9	9.9	8.2	6.5	9.5	6.2	6	5.5	5.7	5	6.2	6.1	5.7
Irkutsk Oblast	10	8.9	8.1	8.7	10.8	10.1	9.1	7.8	8.3	8.8	8.2	8.8	8.7
Kemerovsk Oblast	8.6	7.3	6.3	6.7	9.7	8.9	8.1	7.1	6	6.2	7.7	7.9	7.1
Novosibirsk Oblast	7.8	7.4	7.1	7.3	10	7.7	6.8	5.6	5.9	5.1	6.9	7.4	6
Omsk Oblast	8.6	9.3	8	8	8.5	8.1	7.9	6.9	6.8	6.7	6.8	7.2	7
Tomsk Oblast	10.5	9	6.9	8	8.7	7.7	9.1	8.4	7.6	7.6	7.7	7.2	6.3
Srepublic of Sakha	8.9	9.5	7.6	9	8.7	8.9	9	8	7.4	7.4	7.3	7.2	7.1
Primorskiy Kray	8	8	7	7.5	9.8	9.5	8	6.9	7.1	6.9	6.9	6	5.4
Khabarovskiy Kray	5.7	6	5.9	8.7	10.5	8.9	6.6	6.4	5.7	5.9	5.3	5	4.8
Amursk Oblast	10.3	8.2	6.4	5.1	8.7	6.9	6	5.3	6.1	5.6	5.8	5.9	5.9
Kamchatskiy Kray	9.5	9.1	9.8	8.9	7.7	7	6.1	5.8	5.7	6.1	4.5	4.1	4.3
Magadansk Oblast	7	5.4	5.7	7.3	6.6	5.6	4.5	3.4	2.9	3.1	4.3	4.4	5.2
Sakhalin Oblast	7.6	4.6	4.7	8.1	10	8.9	7.9	7.7	7.2	6.5	6.3	6.3	5.9
Jewish Autonomous Oblast	7.9	9.8	9.7	10.1	8.5	9.3	8.5	8.5	8.3	8.7	7.9	8.2	8.3
Chukotska Autonomous Oblast	4.4	3.7	3.6	4.7	4.4	4.5	5.6	4.3	3.3	3.2	4	3.5	2.9
Number of high education institutions per 10,000 population
	2005	2006	2007	2008	2009	2010	2011	2012	2013	2014	2015	2016	2017
Republic of Altay	0.0495041	0.0516294	0.0493984	0.0490418	0.0487716	0.0485536	0.048198	0.0477589	0.0473944	0.0470204	0.0466349	0.0462783	0.0462783
Republic of Buryatia	0.0412816	0.0524348	0.0518205	0.0517665	0.0516441	0.0515126	0.0514687	0.0514614	0.0513962	0.0512202	0.0510001	0.0508539	0.0508539
Republic of Tuva	0.0329515	0.0337722	0.0329956	0.0328359	0.0326461	0.0324962	0.0323897	0.0322681	0.0321428	0.0319725	0.0317756	0.0315364	0.0315364
Republic of Khakassia	0.0373205	0.0395192	0.0376489	0.037623	0.0375723	0.0375578	0.0375791	0.037553	0.0187423	0.0186937	0.0186467	0.0186142	0.0186142
Altai Kray	0.0396594	0.0416047	0.0446566	0.044968	0.0451775	0.0412531	0.0455998	0.0499378	0.0375831	0.0418809	0.0420028	0.0421723	0.0295206
Zabaykalskiy Kray	0.0265945	0.0277468	0.0269471	0.0270193	0.0360658	0.0361153	0.0362721	0.0364537	0.0183023	0.0183672	0.0184292	0.0185014	0.0185014
Krasnoyarsk Kray	0.0554473	0.0559958	0.045755	0.0458586	0.0458922	0.0423882	0.0423467	0.0386992	0.0386013	0.0350166	0.0349329	0.0313491	0.0278659
Irkutsk Oblast	0.0518318	0.0577714	0.060941	0.0611783	0.0613663	0.0616226	0.065948	0.0660287	0.0578468	0.0537939	0.049713	0.0456271	0.0414791
Kemerovsk Oblast	0.0390147	0.0399022	0.0431171	0.043192	0.0432485	0.0433666	0.0435407	0.0436898	0.0365195	0.029309	0.0293976	0.0294851	0.0257995
Novosibirsk Oblast	0.0939702	0.101212	0.0983001	0.098268	0.0941528	0.0938428	0.0896639	0.0889494	0.088225	0.0839723	0.0798685	0.0757878	0.0757878
Omsk Oblast	0.0987562	0.10553	0.0950815	0.0954533	0.0956769	0.0959464	0.0961689	0.0911669	0.0911886	0.0860311	0.0758218	0.0708655	0.0658037
Tomsk Oblast	0.0778878	0.0889995	0.0878319	0.0874708	0.0868823	0.0861745	0.0854585	0.0848259	0.0843339	0.0839325	0.0836736	0.0742235	0.0649456
Srepublic of Sakha	0.0838766	0.0841542	0.0835497	0.0834645	0.0834901	0.0939165	0.0940382	0.06278	0.0732838	0.0732333	0.0730466	0.0728209	0.0728209
Primorskiy Kray	0.0207757	0.024156	0.0910804	0.0918656	0.0925434	0.0930487	0.0934847	0.0624311	0.0624596	0.0627811	0.0631527	0.0634071	0.0634071
Khabarovskiy Kray	0.0688641	0.0606023	0.0554719	0.0557386	0.0609945	0.0663481	0.0512291	0.0461805	0.0411758	0.0464897	0.0466042	0.0415355	0.0415355
Amursk Oblast	0.257136	0.295558	0.139977	0.14043	0.12591	0.126295	0.119165	0.11175	0.1044	0.0896119	0.0897916	0.0749668	0.0749668
Kamchatskiy Kray	0.100737	0.103379	0.0590043	0.0594121	0.0597452	0.0601118	0.0605975	0.0610321	0.0491345	0.0493478	0.0495184	0.0497686	0.0497686
Magadansk Oblast	0.0580831	0.0619536	0.0604427	0.0615517	0.0625114	0.0633843	0.0643045	0.0651797	0.0660786	0.0670277	0.0679311	0.0685129	0.0685129
Sakhalin Oblast	0.0380614	0.0394858	0.0391077	0.0394376	0.0397545	0.0400794	0.0403168	0.040457	0.0406368	0.0408406	0.0409969	0.041041	0.041041
Jewish Autonomous Oblast	0.054434	0.0557235	0.0558478	0.0560443	0.0562354	0.0565284	0.0570262	0.057623	0.0583009	0.0590413	0.0597928	0.060544	0.060544
Chukotska Autonomous Oblast	0	0	0	0	0	0	0	0	0	0	0	0	0
Number of doctors per 10,0000 population
	2005	2006	2007	2008	2009	2010	2011	2012	2013	2014	2015	2016	2017
Republic of Altay	38.9	40.4	41.3	41.8	43.7	43.5	41.7	42.9	45.9	46.8	44.7	45.1	47.5
Republic of Buryatia	38.6	39.2	40.9	39.9	40.7	41.3	46	42.8	44.8	44.3	45.6	46.4	46.4
Republic of Tuva	42.8	43.9	43.6	45	45.8	45.6	37.9	47	47.8	46.9	48.9	50.2	52.9
Republic of Khakassia	37.8	39.2	39.1	39.4	38.6	38.1	50.4	38.6	39.8	40	39	41.5	43.1
Altai Kray	46.7	47.8	49.2	47.5	48.2	48.7	57.2	46	45.7	44.9	42.9	43.1	43.3
Zabaykalskiy Kray	52.5	55.3	55.9	57.1	57.1	56.1	52.9	58.3	52.8	52.2	48.8	50.7	51.9
Krasnoyarsk Kray	50.3	50.4	51.6	51.8	52.4	53.7	50.9	49.6	50.6	50.1	47.6	47.8	49.1
Irkutsk Oblast	47.5	47.1	49.7	49.7	50.8	49.9	48.4	51.3	48.1	49	45.5	46.9	48.1
Kemerovsk Oblast	47	47.7	48.3	48.1	48.2	47.7	58.5	48.8	47.3	45.9	42.9	43.9	44.7
Novosibirsk Oblast	61.7	58.6	57.2	57.8	57.5	58.3	58.8	55.9	55.5	55.8	51.6	50.5	53.1
Omsk Oblast	55.8	56.5	57.5	57.8	57.7	53.9	70.1	54.9	55.1	54.6	50.6	50	51.2
Tomsk Oblast	67.3	68.3	67.6	66.8	68.2	69.1	58.1	61.9	61.1	61.2	53.5	54.8	55.7
Srepublic of Sakha	49.3	53.7	52.2	54.1	55.1	57.1	53.8	55.9	56.3	56.9	55.2	56	60.5
Primorskiy Kray	53.2	55	54.8	48.3	47.7	49.3	56.1	53	54.3	52.6	53.6	52.9	53.2
Khabarovskiy Kray	53.5	53.4	52.7	52.4	53	52.7	63.5	55.1	52	52.3	50	49.7	50.3
Amursk Oblast	60.5	61	60.6	59.2	59.8	61.1	65.6	59.8	57.9	56.4	53.5	58	57.5
Kamchatskiy Kray	60.7	61.9	62.8	61	60.5	62.8	55.7	60.4	60.6	58.8	55.4	54.2	55.7
Magadansk Oblast	55.2	56.7	57.5	55.7	56	55.6	50.9	56.6	59.5	60.2	61	61.2	61.8
Sakhalin Oblast	44	46.5	47.2	48.7	48.8	49.1	36.6	51.2	52.3	49.2	54.1	56	58.4
Jewish Autonomous Oblast	37	37.7	37.8	36.7	36.1	35.4	76.5	36.3	37.7	38.7	37.9	36.8	37
Chukotska Autonomous Oblast	78.8	77.9	74.8	76.7	74.1	76.7	48.1	73.1	73.8	65.5	65	69.4	74.8
Number of sports facilities per 10,000 population
	2005	2006	2007	2008	2009	2010	2011	2012	2013	2014	2015	2016	2017
Republic of Altay	20.2004	19.3688	20.2436	20.3908	20.5037	20.5958	20.7478	20.9385	21.0995	21.2674	21.4432	21.6084	21.6084
Republic of Buryatia	96.8954	95.3565	96.4869	96.5876	96.8166	97.0637	97.1465	97.1601	97.2835	97.6178	98.039	98.3209	98.3209
Republic of Tuva	30.3476	29.6102	30.307	30.4544	30.6315	30.7728	30.874	30.9904	31.1111	31.2769	31.4707	31.7094	31.7094
Republic of Khakassia	53.5898	50.6083	53.1224	53.159	53.2307	53.2513	53.221	53.258	53.3552	53.4938	53.6289	53.7225	53.7225
Altai Kray	252.147	240.357	246.324	244.618	243.484	242.406	241.229	240.299	239.469	238.773	238.079	237.123	237.123
Zabaykalskiy Kray	112.805	108.121	111.329	111.032	110.908	110.756	110.277	109.728	109.276	108.89	108.523	108.1	108.1
Krasnoyarsk Kray	288.562	285.736	284.122	283.48	283.272	283.098	283.375	284.243	284.964	285.579	286.263	287.089	287.089
Irkutsk Oblast	250.811	242.334	246.14	245.185	244.434	243.417	242.615	242.319	242.019	241.663	241.386	241.085	241.085
Kemerovsk Oblast	281.945	275.674	278.312	277.829	277.466	276.711	275.604	274.664	273.826	272.953	272.131	271.324	271.324
Novosibirsk Oblast	266.042	256.886	264.496	264.583	265.526	266.403	267.666	269.816	272.032	273.9	275.453	277.09	277.09
Omsk Oblast	202.519	189.519	199.829	199.05	198.585	198.027	197.569	197.44	197.393	197.603	197.832	197.557	197.557
Tomsk Oblast	102.712	101.124	102.469	102.892	103.588	104.439	105.314	106.1	106.719	107.229	107.561	107.783	107.783
Srepublic of Sakha	95.3782	95.0636	95.7514	95.8492	95.8197	95.8298	95.7058	95.5719	95.5191	95.5849	95.8292	96.1262	96.1262
Primorskiy Kray	144.4	124.193	32.9379	32.6564	32.4172	32.2412	32.0908	32.0353	32.0207	31.8567	31.6693	31.5422	31.5422
Khabarovskiy Kray	174.256	181.511	198.299	197.35	196.739	195.936	195.201	194.887	194.289	193.591	193.116	192.606	192.606
Amursk Oblast	66.1129	64.2851	135.737	135.299	135.018	134.606	134.268	134.228	134.1	133.911	133.643	133.392	133.392
Kamchatskiy Kray	49.634	48.3655	84.7396	84.1579	83.6887	83.1783	82.5116	81.9241	81.4092	81.0573	80.7781	80.372	80.372
Magadansk Oblast	17.2167	16.1411	16.5446	16.2465	15.9971	15.7768	15.551	15.3422	15.1335	14.9192	14.7208	14.5958	14.5958
Sakhalin Oblast	52.5467	50.6511	51.1408	50.713	50.3088	49.9009	49.6071	49.4352	49.2165	48.9709	48.7842	48.7318	48.7318
Jewish Autonomous Oblast	18.3709	17.9458	17.9058	17.843	17.7824	17.6902	17.5358	17.3542	17.1524	16.9373	16.7244	16.5169	16.5169
Chukotska Autonomous Oblast	5.21029	4.96064	5.2869	5.2482	5.1658	5.07629	5.0667	5.0884	5.0668	5.0548	5.0349	4.999	4.999
Number of public buses per 100,000 population
	2005	2006	2007	2008	2009	2010	2011	2012	2013	2014	2015	2016	2017
Republic of Altay	37	36	34	38	36	48	38	33	32	67	55	56	49
Republic of Buryatia	20	14	17	12	15	158	155	151	174	206	280	280	261
Republic of Tuva	29	30	28	28	23	248	230	226	228	224	216	222	210
Republic of Khakassia	50	44	40	32	28	72	73	59	49	118	101	78	84
Altai Kray	29	18	20	18	19	105	100	90	93	138	138	130	132
Zabaykalskiy Kray	32	33	31	30	29	143	134	134	124	138	161	182	163
Krasnoyarsk Kray	76	68	65	59	60	120	135	107	98	118	119	112	112
Irkutsk Oblast	56	47	44	41	42	151	135	142	123	87	93	101	118
Kemerovsk Oblast	90	77	65	62	54	98	112	110	107	111	111	109	108
Novosibirsk Oblast	28	27	30	28	30	107	118	170	174	80	130	126	124
Omsk Oblast	82	86	83	82	81	95	96	94	96	215	223	235	208
Tomsk Oblast	40	38	29	22	17	64	70	60	66	118	118	116	86
Srepublic of Sakha	52	47	40	44	41	119	117	115	121	109	111	49	51
Primorskiy Kray	60	61	15	37	32	86	89	104	90	147	166	148	141
Khabarovskiy Kray	24	24	23	23	19	86	88	94	102	89	76	70	84
Amursk Oblast	62	55	49	46	50	103	112	109	106	107	104	107	109
Kamchatskiy Kray	28	23	21	20	18	113	109	104	101	100	88	100	96
Magadansk Oblast	60	64	57	27	25	109	111	108	79	72	73	67	73
Sakhalin Oblast	4	2	2	0	1	73	103	100	84	59	62	97	92
Jewish Autonomous Oblast	36	36	73	68	56	149	154	140	133	113	96	91	90
Chukotska Autonomous Oblast	67	93	93	100	102	102	102	63	65	63	74	54	55
The volume of communication services per capita
	2005	2006	2007	2008	2009	2010	2011	2012	2013	2014	2015	2016	2017
Republic of Altay	1040	1170	1480	1915	2318	2940	3247	3499	3676	3678	4000	4065	4014
Republic of Buryatia	1586	2163	2638	3402	3471	3888	5361	5700	7380	7719	7398	7624	7643
Republic of Tuva	579	798	1046	1544	1794	2325	2571	3016	3233	3460	3784	3660	3484
Republic of Khakassia	1943	2432	3704	4360	4917	5481	5717	5999	6074	6432	6434	6226	6661
Altai Kray	1507	2037	2785	3537	3930	4463	4622	4737	5069	5677	5769	6109	6131
Zabaykalskiy Kray	1529	2234	2725	3421	4219	5259	6869	8678	9087	9379	9893	9068	8154
Krasnoyarsk Kray	2804	3457	4190	4610	5042	5950	6343	6827	7535	7713	7469	7304	7270
Irkutsk Oblast	2132	2841	3940	4746	4933	5550	6566	7504	7553	7627	6580	6580	7035
Kemerovsk Oblast	1877	2377	3141	3756	3946	4393	4783	5835	6233	6068	5918	6115	6476
Novosibirsk Oblast	2742	3634	5036	5939	7505	6703	6871	7746	8539	9315	8742	8563	8563
Omsk Oblast	1916	2497	3149	3721	4157	4437	4773	5040	5480	5243	5137	5494	5863
Tomsk Oblast	2707	3527	4457	5328	5560	5753	6226	6526	7085	7285	8024	8076	7968
Srepublic of Sakha	3334	3938	4917	5957	6945	7629	8593	8904	9209	9385	9846	10639	10739
Primorskiy Kray	4846	6146	6802	7906	8792	10453	11861	12818	13361	13626	13560	15008	15997
Khabarovskiy Kray	3932	4270	5212	5617	5877	6639	7426	8514	8754	8765	8261	8950	9633
Amursk Oblast	3856	4566	5511	6451	7208	7782	8872	10648	11022	11077	11150	11819	12099
Kamchatskiy Kray	2227	2960	3286	4147	4573	5813	6838	7476	7655	7435	7343	7989	8287
Magadansk Oblast	3827	4313	5300	5960	7324	10190	9926	11124	11489	11574	11285	13872	15020
Sakhalin Oblast	4364	5646	7061	8182	9159	10847	11878	13036	12740	12326	11723	12544	12699
Jewish Autonomous Oblast	1583	1807	2396	3242	3854	4629	4846	5243	5532	5631	5878	6093	5876
Chukotska Autonomous Oblast	5450	5778	3521	3349	10136	12298	12783	6922	12134	13926	14463	13914	13208
[truncated: 3 more columns]

## Sheet: ecological environment
Forest area per capita (ha)
	2005	2006	2007	2008	2009	2010	2011	2012	2013	2014	2015	2016	2017
Republic of Altay	20.663	22.0612	21.597	21.9266	22.0204	21.9268	19.872	19.6767	19.5265	19.3677	19.1996	19.0759	19.0898
Republic of Buryatia	22.972	23.3043	22.9934	22.9315	22.9207	22.9591	22.9561	23.0486	23.0399	22.9743	22.8256	22.8517	22.9158
Republic of Tuva	26.9695	27.8701	27.453	27.5428	27.3803	27.2611	27.1879	27.0955	26.9903	26.7834	26.6057	26.418	26.4117
Republic of Khakassia	5.62271	5.98282	5.72715	5.75068	5.7448	5.74634	5.74961	5.74562	5.74452	5.73337	5.71893	5.71083	5.71083
Altai Kray	1.44884	1.52223	1.48763	1.5003	1.55205	1.56349	1.56988	1.58011	1.58851	1.59817	1.60409	1.6114	1.61309
Zabaykalskiy Kray	26.1422	27.2966	26.5309	26.623	26.6102	26.6224	26.728	26.8463	26.9538	27.0641	27.1472	27.2544	27.2711
Krasnoyarsk Kray	36.9022	37.3094	37.5637	37.6912	37.7061	37.7361	37.7285	37.629	37.5226	37.4387	37.3464	37.2166	37.1971
Irkutsk Oblast	25.298	26.2962	26.0013	26.2145	26.2999	26.434	26.5313	26.56	26.588	26.597	26.5849	26.5807	26.5425
Kemerovsk Oblast	2.04664	2.09291	2.07278	2.07609	2.06295	2.07184	2.07653	2.084	2.0922	2.09743	2.10413	2.10892	2.11076
Novosibirsk Oblast	1.76243	1.82851	1.77908	1.78167	1.78702	1.78114	1.77236	1.75638	1.75531	1.74918	1.75202	1.74961	1.75286
Omsk Oblast	2.25233	2.4064	2.28186	2.29038	2.30078	2.30675	2.31362	2.31564	2.3167	2.31626	2.30043	2.3092	2.3087
Tomsk Oblast	18.5651	18.8742	18.644	18.5846	18.81	18.6597	18.4961	18.3884	18.1946	18.0875	18.0149	17.9185	17.9046
Srepublic of Sakha	156.751	160.262	162.081	164.883	164.816	164.756	164.976	164.997	165.048	164.267	163.944	163.544	163.077
Primorskiy Kray	10.6712	13.5659	55.5178	60.4017	60.6715	61.5145	61.809	61.9129	61.9412	62.2632	62.6285	62.8809	62.8872
Khabarovskiy Kray	20.8608	15.6783	10.3704	6.42058	6.39934	6.5455	6.57372	6.58842	6.5696	6.57623	6.58879	6.60467	6.60415
Amursk Oblast	52.8575	63.4088	34.3158	38.7262	38.8535	38.9902	39.1255	38.9554	38.7801	38.8774	38.986	39.0915	39.1409
Kamchatskiy Kray	42.593	45.3245	26.7905	27.9035	28.0994	28.2694	28.5075	28.8352	29.0766	29.2003	29.3025	29.4369	29.4269
Magadansk Oblast	99.3569	106.926	105.243	108.115	109.807	110.029	111.125	112.67	114.223	115.898	117.473	118.493	118.527
Sakhalin Oblast	10.9027	11.3463	11.2728	11.4034	11.664	11.7693	11.8854	11.9368	12.0143	12.1174	12.1679	12.1563	12.1625
Jewish Autonomous Oblast	8.97073	9.20552	9.24839	9.30336	9.29571	9.3385	9.40363	9.48474	9.57883	9.68867	9.82994	9.94133	9.92922
Chukotska Autonomous Oblast	95.4112	100.104	93.8243	94.4134	95.8999	97.6106	96.9073	96.494	96.8461	97.076	97.4399	97.9596	97.9596
Sown area of all crops per capita (ha)
	2005	2006	2007	2008	2009	2010	2011	2012	2013	2014	2015	2016	2017
Republic of Altay	0.511872	0.528169	0.517695	0.503169	0.488692	0.513212	0.506561	0.522005	0.500011	0.521456	0.533037	0.511838	0.517391
Republic of Buryatia	0.228907	0.209005	0.209666	0.18698	0.19883	0.196984	0.192699	0.187526	0.164982	0.152636	0.15351	0.144425	0.144222
Republic of Tuva	0.126534	0.0834172	0.0732503	0.0669853	0.070842	0.0981385	0.0971691	0.124555	0.149143	0.107428	0.0861119	0.102809	0.101232
Republic of Khakassia	0.372272	0.406851	0.396255	0.386012	0.406156	0.41445	0.462787	0.477675	0.484114	0.477251	0.439875	0.441528	0.434641
Altai Kray	2.05884	2.13395	2.10061	2.21521	2.24463	2.11863	2.2746	2.25844	2.2896	2.28012	2.2537	2.26815	2.27642
Zabaykalskiy Kray	0.247152	0.250831	0.224739	0.211741	0.217837	0.196287	0.202943	0.198308	0.193273	0.195152	0.192217	0.185292	0.187604
Krasnoyarsk Kray	0.557246	0.516946	0.506156	0.522153	0.530197	0.510919	0.512078	0.516072	0.523961	0.523813	0.526788	0.532134	0.52555
Irkutsk Oblast	0.285234	0.276477	0.269441	0.278198	0.27533	0.260253	0.262638	0.263702	0.269442	0.269673	0.273753	0.27397	0.28239
Kemerovsk Oblast	0.377839	0.39953	0.400918	0.401685	0.394427	0.368435	0.361206	0.363098	0.361507	0.341194	0.3459	0.342617	0.340811
Novosibirsk Oblast	0.953459	0.940222	0.915023	0.930749	0.939042	0.870899	0.896713	0.891533	0.885632	0.867616	0.844536	0.844673	0.858928
Omsk Oblast	1.43779	1.54211	1.42247	1.44928	1.46849	1.40768	1.4398	1.45928	1.5075	1.5223	1.52073	1.52234	1.52087
Tomsk Oblast	0.378145	0.389521	0.379043	0.377582	0.385082	0.361933	0.365762	0.360416	0.351766	0.336383	0.309685	0.323151	0.328532
Srepublic of Sakha	0.0513744	0.0480731	0.0443858	0.0368287	0.0450847	0.0454973	0.0453473	0.0476081	0.0464829	0.0459278	0.0470629	0.0461893	0.048686
Primorskiy Kray	0.0130194	0.0169092	0.0649707	0.0670619	0.0697161	0.0663747	0.0691787	0.0658648	0.0608981	0.063409	0.0631527	0.062456	0.0656264
Khabarovskiy Kray	0.195172	0.180595	0.157994	0.15622	0.177037	0.157602	0.17131	0.190726	0.190489	0.213749	0.208476	0.219411	0.240023
Amursk Oblast	0.116921	0.123823	0.0567273	0.0569851	0.058659	0.0507408	0.0534006	0.0540126	0.0507831	0.0562315	0.0520791	0.0514273	0.0566
Kamchatskiy Kray	1.1613	1.29534	0.781689	0.862664	0.90992	0.950729	1.03816	1.22296	1.1409	1.30673	1.44272	1.51023	1.55863
Magadansk Oblast	0.0394965	0.0489433	0.0519807	0.0517034	0.0462584	0.0367629	0.0372966	0.038456	0.0363432	0.0348544	0.0400793	0.0452185	0.047959
Sakhalin Oblast	0.0454834	0.0461984	0.045756	0.0500858	0.0496931	0.0486965	0.0459612	0.0449073	0.0461227	0.0498255	0.0496062	0.0533533	0.058073
Jewish Autonomous Oblast	0.474665	0.511541	0.535022	0.571652	0.591596	0.607681	0.626148	0.648258	0.66463	0.713219	0.743225	0.718052	0.891813
Chukotska Autonomous Oblast	0	0	0	0	0	0	0	0	0	0	0	0	0
Air pollutants emitted from stationary sources per capita (kg)
	2005	2006	2007	2008	2009	2010	2011	2012	2013	2014	2015	2016	2017
Republic of Altay	64.3553	67.1182	54.3383	53.946	48.7716	29.1322	43.3782	42.983	42.655	37.6163	37.3079	32.3948	32.3948
Republic of Buryatia	89.7876	88.0905	94.3133	101.462	99.1566	97.8739	92.6436	102.923	117.183	108.587	111.18	95.6053	114.93
Republic of Tuva	79.0836	77.676	69.2908	72.239	65.2922	74.7413	61.5404	64.5362	61.0714	60.7477	63.5512	59.9191	63.0727
Republic of Khakassia	179.138	179.813	176.95	186.234	180.347	180.277	169.106	176.499	168.681	157.027	165.955	171.25	214.063
Altai Kray	92.4064	91.1143	87.2834	86.6656	80.9089	85.3938	84.5668	89.888	83.9356	85.0181	85.6857	89.8269	86.0314
Zabaykalskiy Kray	124.108	132.26	123.059	126.09	131.64	124.598	118.791	115.74	116.22	114.795	109.654	112.859	123.96
Krasnoyarsk Kray	881.266	864.435	879.904	867.08	863.48	879.908	888.222	908.728	876.25	824.99	864.939	823.088	825.875
Irkutsk Oblast	200.151	219.531	225.076	257.765	229.101	245.258	255.961	297.129	283.449	263.59	264.722	266.296	273.762
Kemerovsk Oblast	454.698	475.562	522.436	540.98	507.449	509.918	504.346	495.151	495.205	487.996	493.88	497.192	548.423
Novosibirsk Oblast	80.0626	83.3054	78.262	87.6853	87.7504	85.5846	87.4223	83.3901	72.0504	75.9401	67.1621	72.5397	70.3744
Omsk Oblast	99.7438	104.475	99.0849	118.563	107.762	116.146	119.452	121.556	108.413	103.237	102.107	101.236	97.6931
Tomsk Oblast	273.581	281.832	312.291	312.951	347.529	330.336	359.875	304.431	286.735	270.449	272.404	279.266	244.01
Srepublic of Sakha	170.899	168.308	169.188	190.925	202.464	168.006	164.044	168.46	172.74	321.18	299.491	267.357	253.833
Primorskiy Kray	28.3934	32.208	112.333	113.301	107.967	114.76	96.6009	106.133	103.058	72.1983	78.9408	91.9403	120.474
Khabarovskiy Kray	149.206	130.57	114.474	122.625	114.873	118.916	115.266	107.241	93.1602	98.1449	99.94	96.5701	96.5701
Amursk Oblast	219.322	202.224	94.3	84.9972	84.4335	86.9205	84.16	85.6752	85.0114	76.9169	86.7985	85.4622	88.4609
Kamchatskiy Kray	209.534	212.962	138.07	129.518	138.609	143.066	162.401	155.022	153.545	162.848	157.221	167.969	165.481
Magadansk Oblast	168.441	173.47	169.239	147.724	150.027	158.461	160.761	189.021	191.628	201.083	183.414	212.39	226.092
Sakhalin Oblast	169.373	193.481	195.539	171.554	230.576	200.397	185.457	175.988	156.452	132.732	147.589	158.008	215.465
Jewish Autonomous Oblast	152.415	133.736	134.035	117.693	106.847	130.015	142.566	144.057	139.922	106.274	113.606	115.034	139.251
Chukotska Autonomous Oblast	614.169	604.761	510.696	476.354	483.952	433.387	434.208	412.703	414.463	356.097	417.089	420.084	400.08
Polluted water discharged into surface water per capita (m3)
	2005	2006	2007	2008	2009	2010	2011	2012	2013	2014	2015	2016	2017
Republic of Altay	2.4752	2.06518	1.97594	2.45209	1.46315	1.45661	1.44594	1.43277	0.947888	1.88081	1.86539	1.85113	1.38835
Republic of Buryatia	62.9545	54.5322	51.8205	47.6251	46.4797	42.2403	8.23499	36.023	32.8935	38.9273	39.7801	38.649	35.5977
Republic of Tuva	26.3612	27.0177	26.3965	26.2687	32.6461	29.2466	29.1507	25.8145	22.5	22.3807	28.598	37.8436	18.9218
Republic of Khakassia	93.3013	86.9423	84.7101	82.7706	75.1446	71.3598	67.6425	63.8402	56.227	56.0812	54.0753	44.674	44.674
Altai Kray	13.4842	11.2333	10.5552	8.9936	6.98198	6.18796	4.97452	3.32919	3.34072	4.60689	6.72045	7.59101	7.16929
Zabaykalskiy Kray	73.5781	73.0666	76.3502	87.3624	88.3612	70.4248	86.1463	78.3754	32.0291	28.4692	32.2512	31.4524	41.6282
Krasnoyarsk Kray	184.016	161.688	158.031	169.677	159.917	156.836	158.094	149.872	137.21	128.511	114.231	109.025	107.284
Irkutsk Oblast	324.547	333.011	320.55	331.994	261.829	244.026	240.298	253.385	222.297	206.9	210.037	213.203	217.351
Kemerovsk Oblast	246.502	265.894	275.59	281.468	268.862	252.972	239.837	208.255	218.387	175.122	169.771	163.642	159.588
Novosibirsk Oblast	27.0634	28.4173	38.1858	39.6852	36.9079	40.1647	35.1183	41.8804	42.2745	39.7956	38.8451	35.0067	33.924
Omsk Oblast	105.669	107.113	103.589	97.4628	97.1876	89.3816	86.0459	80.0242	80.55	76.9219	70.2615	68.8408	65.8037
Tomsk Oblast	11.6832	8.89995	8.78319	7.77518	8.68823	13.4049	24.688	22.6202	25.3002	24.2472	22.313	21.3393	21.3393
Srepublic of Sakha	82.8281	83.1023	101.304	97.0274	94.97	89.7424	90.9036	84.7529	79.5652	82.649	88.6995	52.015	49.9344
Primorskiy Kray	20.0831	25.7664	124.477	143.923	141.9	142.675	118.414	99.8898	90.5664	81.6155	78.9408	72.9182	85.5996
Khabarovskiy Kray	199.706	185.664	170.954	172.283	171.293	189.347	172.13	163.171	146.689	149.8	150.687	143.298	139.144
Amursk Oblast	328.226	325.114	149.554	144.865	142.944	141.896	140.018	131.12	132.737	124.71	127.953	128.943	128.193
Kamchatskiy Kray	201.475	186.083	99.1272	102.189	99.1771	98.5834	95.7441	95.2101	94.5839	55.5163	90.371	92.0719	83.3624
Magadansk Oblast	162.633	173.47	175.284	184.655	181.283	171.137	167.192	110.805	105.726	93.8388	88.3104	95.918	102.769
Sakhalin Oblast	98.9596	94.766	87.9924	94.6503	97.3985	92.1827	92.7287	89.0054	67.0507	61.2609	59.4455	69.7696	67.7176
Jewish Autonomous Oblast	76.2077	78.0129	78.1869	72.8576	78.7295	84.7927	91.242	86.4344	81.6212	76.7536	83.71	84.7616	84.7616
Chukotska Autonomous Oblast	76.7711	100.793	94.5733	114.325	116.148	98.4971	98.6837	98.2627	98.6816	98.9159	79.4455	60.012	60.012
Solid waste per capita (kg)
	2005	2006	2007	2008	2009	2010	2011	2012	2013	2014	2015	2016	2017
Republic of Altay	3.41578	3.56243	0.0493984	0.122605	0.195086	2.65103	0.93986	0.520572	0.838881	0.771134	0.242501	1.13382	1.02738
Republic of Buryatia	18.6077	18.908	20.8629	17.5644	14.2538	17.232	24.7358	29.8559	60.7153	55.664	51.3275	45.9668	49.2235
Republic of Tuva	21.2208	21.7493	21.1172	22.3284	23.1787	22.3346	19.7577	21.0227	16.5487	12.092	25.0296	26.3297	0.0473045
Republic of Khakassia	99.6085	105.477	101.652	99.1366	101.269	103.496	108.514	154.561	233.904	319.014	412.002	482.505	558.544
Altai Kray	0.5473	0.574145	0.945909	1.0915	0.903551	1.24337	1.03346	1.40075	1.38181	1.23842	1.33485	1.19474	4.90464
Zabaykalskiy Kray	49.1644	51.2946	75.1556	67.4132	77.7218	20.8629	12.1738	83.1207	108.986	136.449	343.28	172.66	177.717
Krasnoyarsk Kray	88.9618	89.8418	82.1126	101.63	105.234	106.919	112.08	151.457	124.515	157.597	129.681	127.773	134.989
Irkutsk Oblast	32.0161	33.136	39.6523	28.2644	25.9375	27.5913	38.7985	48.7465	43.1838	53.8072	49.6712	54.0971	56.4237
Kemerovsk Oblast	602.344	616.046	623.51	687.544	635.898	740.311	866.588	982.325	971.887	967.404	852.458	1032.41	1159.98
Novosibirsk Oblast	0.763038	0.790233	0.638951	0.65764	0.715561	0.777394	0.854048	0.742357	0.684846	0.711939	1.40895	4.71003	68.7236
Omsk Oblast	1.3184	1.40883	2.40206	2.59231	2.01425	2.05477	2.00133	3.32556	2.5543	1.3603	1.46285	1.49071	1.60713
Tomsk Oblast	0.817822	0.830662	0.810005	0.359602	0.61783	1.03505	0.953337	1.28558	0.950162	0.789898	0.843244	0.795119	0.659661
Srepublic of Sakha	265.532	266.411	257.542	223.007	188.792	129.873	159.059	301.262	282.019	262.963	263.71	258.053	390.956
Primorskiy Kray	37.7078	43.8432	185.986	161.194	205.753	250.484	255.98	28.3437	128.467	127.822	127.218	106.524	108.452
Khabarovskiy Kray	10.5018	10.082	17.1459	16.1642	12.0972	20.1372	37.2308	42.2757	44.1302	53.5851	54.7526	51.355	49.676
Amursk Oblast	1.21005	1.24446	0.663047	0.517374	0.370322	0.314251	0.393243	0.873142	2.34452	2.02523	1.72774	8.69615	1.82844
Kamchatskiy Kray	1.16855	1.1992	0.68445	0.546592	0.633299	0.528984	0.0642334	0.602997	0.639977	0.599576	0.709351	1.64734	7.8062
Magadansk Oblast	24.8596	26.5161	50.1674	48.7489	44.3831	64.6012	76.9532	98.48	78.4551	66.0491	116.617	245.55	505.625
Sakhalin Oblast	55.3793	57.4519	67.6368	52.945	53.271	73.3133	61.7916	80.3436	47.61	29.154	31.6762	75.2466	54.5578
Jewish Autonomous Oblast	0.653208	0.668682	0.670173	0.616488	0.449883	2.35724	1.0778	1.39448	1.04942	1.18673	1.00452	0.708365	0.65993
Chukotska Autonomous Oblast	225.515	236.865	223.193	367.745	385.226	356.559	269.031	235.555	96.2935	242.977	225.625	218.804	348.81
Capture of air pollutants from stationary sources per capita (kg)
	2005	2006	2007	2008	2009	2010	2011	2012	2013	2014	2015	2016	2017
Republic of Altay	9.90082	20.6518	19.7594	24.5209	4.87716	9.71072	53.0178	71.6384	9.47888	9.40407	9.32697	9.25566	9.25566
Republic of Buryatia	396.304	485.546	556.552	1129.54	692.03	689.238	664.975	718.402	787.389	753.961	741.542	552.273	619.4
Republic of Tuva	135.101	111.448	75.89	95.2242	88.1445	103.988	64.7794	70.9898	48.2142	60.7477	41.3083	40.9973	47.3045
Republic of Khakassia	427.32	387.289	402.843	370.587	358.815	317.363	270.57	352.999	344.859	353.312	320.723	329.471	323.887
Altai Kray	312.119	297.474	281.743	304.965	279.69	320.124	295.155	342.074	233.015	229.507	230.595	242.912	258.938
Zabaykalskiy Kray	344.842	431.001	439.238	413.395	473.363	443.315	433.452	452.025	484.097	495.914	485.61	490.288	512.489
Krasnoyarsk Kray	3326.84	3255.81	3359.83	3311.7	3028.54	3183.35	3199.65	2381.76	2260.99	2232.31	2180.16	2190.95	2240.07
Irkutsk Oblast	1032.25	1112.1	1088	1329.61	1054.68	1158.92	1237.76	1341.62	1464.35	1371.33	1030.72	870.232	962.316
Kemerovsk Oblast	1712.74	1857.99	1753.79	1814.06	1573.53	1742.97	2293.51	1942.01	1647.76	1698.46	1720.86	1560.5	1629.79
Novosibirsk Oblast	361.973	363.585	365.979	396.096	333.301	378.75	338.855	393.601	352.532	382.256	375.382	363.059	378.217
Omsk Oblast	778.693	859.015	817.2	964.581	822.318	902.401	890.322	968.901	841.975	887.639	929.069	878.732	879.744
Tomsk Oblast	240.479	231.399	207.869	253.665	299.261	388.743	334.238	306.316	267.057	289.101	208.254	182.775	78.8625
Srepublic of Sakha	343.894	323.994	320.622	375.59	372.575	420.537	435.71	453.062	471.11	449.862	498.804	498.303	426.523
Primorskiy Kray	3.46261	4.8312	21.2521	18.3731	15.4239	18.6097	12.4646	12.4862	24.9838	18.8343	25.2611	38.0443	53.8961
Khabarovskiy Kray	1548.29	1377.88	1186.59	1293.14	1218.87	1320.33	1306.86	1092.43	960.94	958.721	1047.04	995.295	1011.39
Amursk Oblast	1447.52	1144.9	466.343	402.813	522.895	479.92	431.972	476.801	363.163	319.616	362.908	416.816	366.588
Kamchatskiy Kray	461.377	518.965	290.301	298.249	359.666	341.435	390.248	391.826	393.076	407.119	433.286	479.023	411.835
Magadansk Oblast	336.882	340.745	296.169	276.982	293.803	335.937	289.37	293.309	297.354	301.625	312.483	335.713	335.713
Sakhalin Oblast	749.809	791.691	999.202	808.471	838.819	813.613	802.304	556.284	217.407	98.0174	79.9439	104.654	102.602
Jewish Autonomous Oblast	544.34	440.215	480.291	397.915	506.118	830.968	855.394	887.394	606.329	194.836	269.068	357.21	641.767
Chukotska Autonomous Oblast	729.326	846.665	718.757	628.787	754.965	590.982	572.365	569.924	592.089	534.146	595.841	520.104	520.104
Volume of circulating and consistency ursed water per capita (m3)
	2005	2006	2007	2008	2009	2010	2011	2012	2013	2014	2015	2016	2017
Republic of Altay	54.4545	61.9553	69.1578	73.5627	63.4031	82.5411	57.8376	90.7419	61.6127	28.2122	27.9809	37.0226	41.6505
Republic of Buryatia	279.683	345.021	286.049	333.376	312.963	294.652	310.871	267.6	269.316	279.662	298.861	284.782	306.14
Republic of Tuva	88.9691	91.1848	105.586	52.5375	45.7045	68.242	64.7794	122.619	83.5714	51.156	73.0839	72.5336	37.8436
Republic of Khakassia	600.86	638.236	598.618	645.234	670.665	683.552	755.341	777.348	777.806	848.696	1008.78	1068.45	1088.93
Altai Kray	382.317	409.807	406.375	416.976	409.884	354.364	356.507	357.887	321.544	346.355	381.386	366.055	343.704
Zabaykalskiy Kray	591.284	583.608	823.684	813.281	772.71	752.101	796.173	884.001	976.43	972.543	1008.08	982.425	930.621
Krasnoyarsk Kray	1061.82	1071.97	1119.94	1212.08	1173.78	1151.9	1189.59	1180.33	1165.76	1085.16	1126.24	1040.44	996.205
Irkutsk Oblast	851.238	845.526	825.954	933.989	958.541	1054.98	1006.12	1141.88	987.114	1048.15	1069.24	957.339	1026.61
Kemerovsk Oblast	1625.14	1823.89	1795.83	1813.34	1679.84	1655.52	1726.75	1861.91	1841.68	1746.09	1798.77	1802.64	1804.12
Novosibirsk Oblast	346.562	364.753	334.599	357.922	332.924	367.113	333.998	376.553	301.803	330.048	319.837	313.256	306.76
Omsk Oblast	519.458	607.326	577.495	647.073	583.629	606.987	636.739	736.426	708.738	654.849	663.693	680.815	643.357
Tomsk Oblast	2402.84	2358.49	2355.85	853.326	790.629	844.511	850.787	738.928	711.216	715.292	692.632	708.834	732.957
Srepublic of Sakha	1191.05	1184.47	1091.37	1140.33	1047.8	1110.3	1608.05	1330.94	1323.3	1308.78	1300.23	1341.99	1303.49
Primorskiy Kray	18.6981	21.7404	72.8643	79.6169	58.6109	31.0162	40.5101	37.4587	34.3528	31.3906	28.4187	47.5553	47.5553
Khabarovskiy Kray	1181.02	1069.36	910.748	946.543	899.161	942.144	1059.42	1088.32	1025.28	1048.6	1098.3	954.279	953.759
Amursk Oblast	1964.82	2058.02	954.787	1035.49	1036.9	995.5	975.66	1010.97	1035.05	1030.54	1199.47	1146.24	1185.98
Kamchatskiy Kray	1650.08	1592.04	913.386	901.876	847.187	865.61	915.023	917.923	964.264	1001.76	1003.98	1017.77	1177.03
Magadansk Oblast	1783.15	1951.54	1988.56	2178.93	2300.42	2567.06	2507.88	2887.46	2973.54	2982.73	2934.62	2987.16	3041.97
Sakhalin Oblast	517.635	527.136	549.463	591.564	560.538	547.084	530.166	560.329	440.909	449.246	383.321	396.045	389.889
Jewish Autonomous Oblast	70.7643	55.7235	50.263	50.4399	39.3648	33.9171	28.5131	34.5738	29.1504	35.4248	47.8343	60.544	78.7072
Chukotska Autonomous Oblast	3397.12	3426.98	3177.66	3277.32	2961.79	3427.7	3355.24	3262.32	3355.17	3422.49	3217.54	3440.69	3680.74
